# Supplementary material for: Photoreduction and validation of haem–ligand intermediate states in protein crystals by in situ single-crystal spectroscopy and diffraction
Source: PubMed Central journal article supplement (PMC5414400; doi:10.1107/s2052252517002159), 2017-04-10
Supplement: m-04-00263-sup1.pdf [file m-04-00263-sup1.pdf]

# IUCrJ

Volume 4 (2017)

Supporting information for article:

**Photoreduction and validation of haem-ligand intermediate states in protein crystals by *in situ* single-crystal spectroscopy and diffraction**

**Demet Kekilli, Tadeo Moreno-Chicano, Amanda K. Chaplin, Sam Horrell, Florian S. N. Dworkowski, Jonathan A. R. Worrall, Richard W. Strange and Michael A. Hough**

**Table S1** High-frequency single-crystal resonance Raman laser-induced photoreduction measurements on AXCP crystals at 100K using an excitation wavelength of 405.4 nm.

Laser reduction effects were evident above the laser power density of 4.0 mW mm<sup>-2</sup>. Total laser reduction of the haem from Fe<sup>3+</sup> to Fe<sup>2+</sup> within the duration of the experiment was observed at the laser power density of 9.8 mW mm<sup>-2</sup>.

| <i>Laser power densities (mW mm<sup>-2</sup>)</i> | <i>Time (s)</i> | <i><math>\nu_4</math> (cm<sup>-1</sup>)</i> | <i><math>\nu_3</math> (cm<sup>-1</sup>)</i> | <i><math>\nu_2</math> (cm<sup>-1</sup>)</i> | <i><math>\nu_{10}</math> (cm<sup>-1</sup>)</i> |
|---------------------------------------------------|-----------------|---------------------------------------------|---------------------------------------------|---------------------------------------------|------------------------------------------------|
|                                                   | 0               | 1369                                        | 1493                                        | 1577                                        | 1630                                           |
| 1.6                                               | 800             | 1369                                        | 1493                                        | 1577                                        | 1630                                           |
|                                                   | 0               | 1368                                        | 1493                                        | 1578                                        | 1629                                           |
| 4.0                                               | 800             | 1368                                        | 1493                                        | 1578                                        | 1629                                           |
|                                                   | 0               | 1368                                        | 1492                                        | 1578                                        | 1629                                           |
| 5.9                                               | 800             | 1368 (1351sh)                               | 1492 (1466sh)                               | 1578                                        | 1629                                           |
|                                                   | 0               | 1368                                        | 1495                                        | 1579                                        | 1628                                           |
| 9.8                                               | 2000            | 1351 (1367sh)                               | 1467 (1495sh)                               | 1579                                        | 1628                                           |

Abbreviations: sh; shoulder

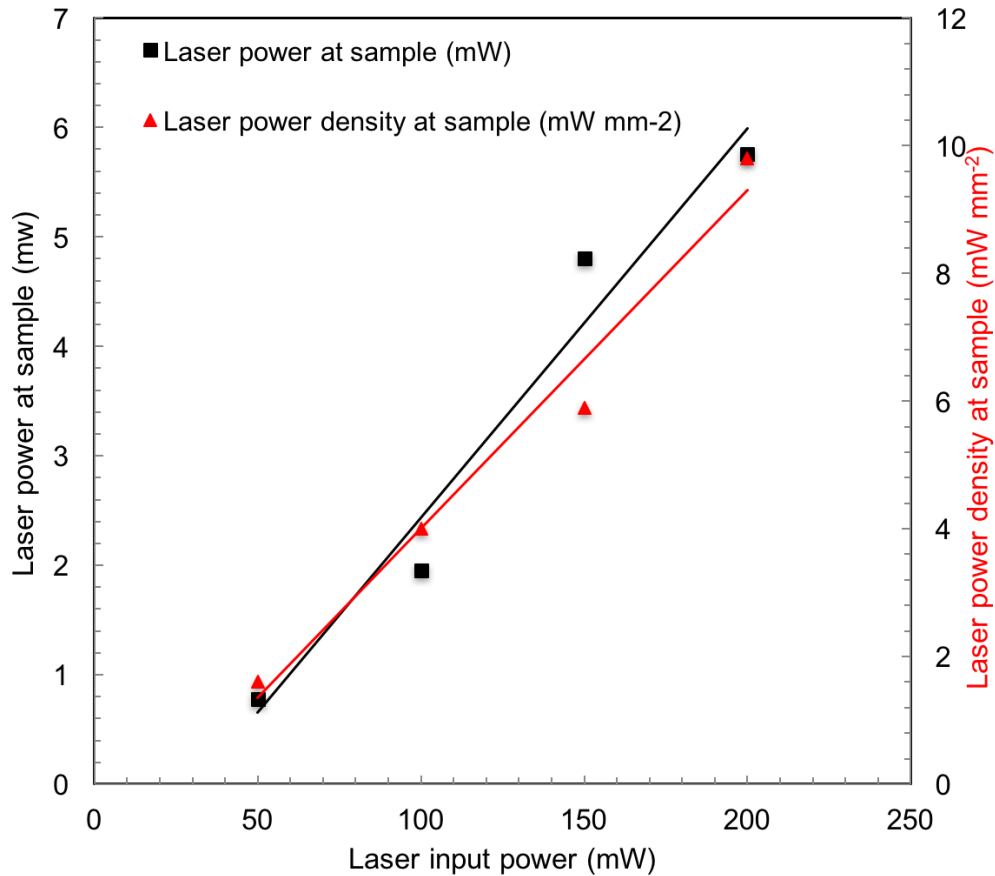

**Figure S1** Dependence of measured input laser power and sample laser power at sample position upon the output power of the laser in the optics enclosure. A linear dependence is observed within the measured input laser power from 50 to 200 mW and the laser power densities. (1.6 – 9.8 mW mm<sup>-2</sup>). The laser power density at each laser power at sample was calculated using the online calculator by OPHIR Photonics. A continuous wave, top-hat laser profile with a diameter of 25  $\mu\text{m}$  was selected.

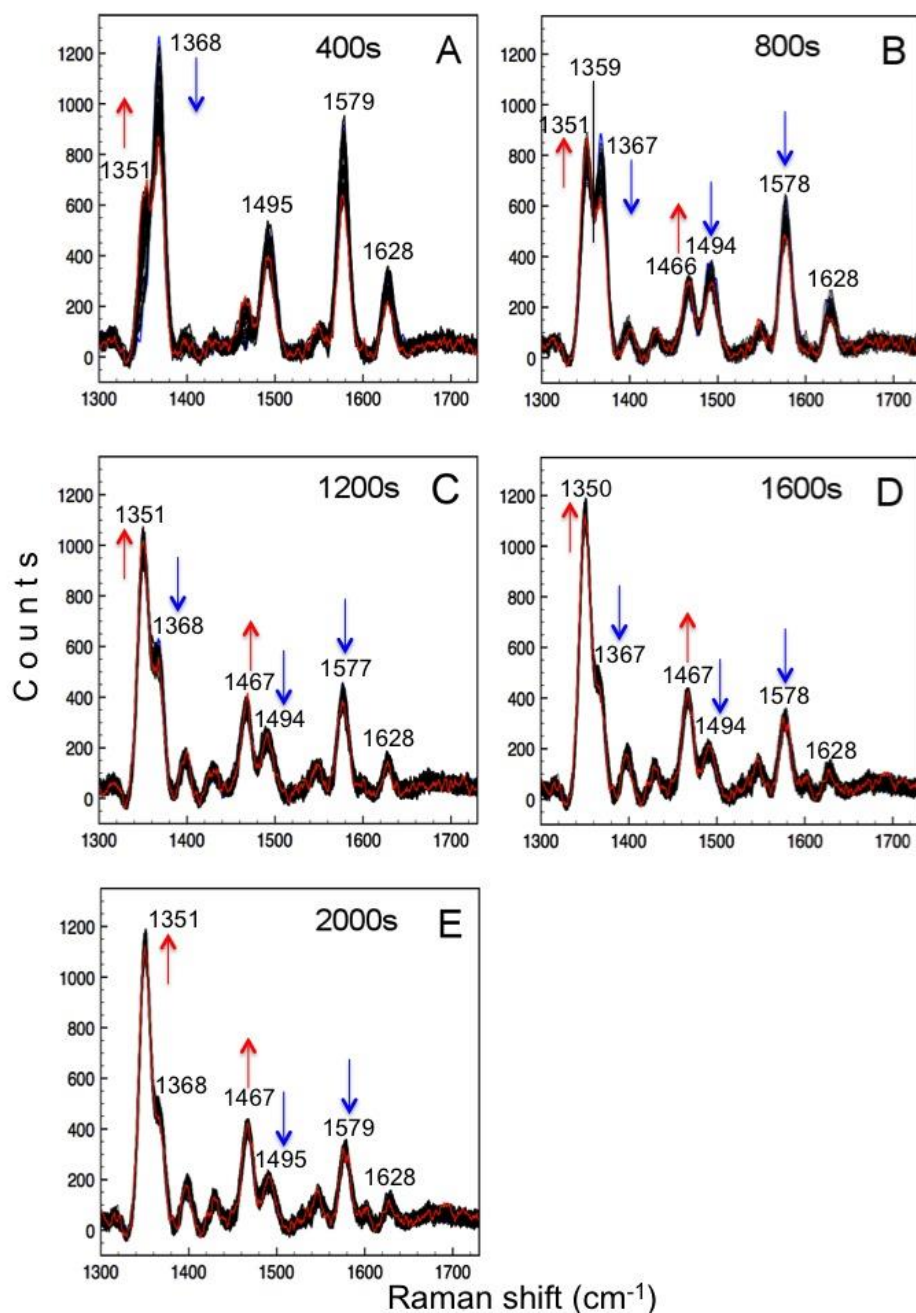

**Figure S2** The effects of haem Fe photoreduction on AXCP protein crystals by the excitation laser with a laser power density of  $9.8 \text{ mW mm}^{-2}$ . (A) Small but significant photoreduction (appearance of the  $1351 \text{ cm}^{-1}$  shoulder) is evident after the first kinetic series with a total exposure time of 400s; (B) At longer exposures (800s) an equally proportioned ferrous and ferric state is observed with an isosbestic point at  $1359 \text{ cm}^{-1}$ . (C-E) Clear photoreduction is evident from 1200s and is almost complete by 2000s with the  $1351 \text{ cm}^{-1}$  peak being the major peak. Red spectra represent the final spectra of each series and blue spectra represent the first spectra of each series with the black spectra being the intermediates.

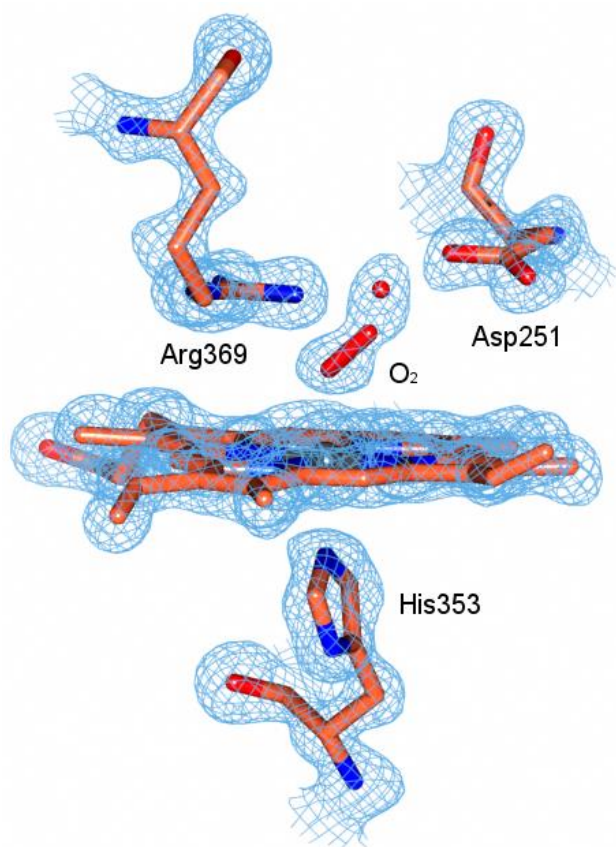

**Figure S3** 2Fo-Fc map contoured at 1σ of the DtpA haem site of monomer A after collection of the first dataset at BM30 (ESRF), with a dose of 0.99 MGy. Electron density features at the distal site are well fitted with a molecular oxygen molecule. Additional electron density was modelled as a partial occupancy water molecule, stabilized by hydrogen bonding by Asp251.

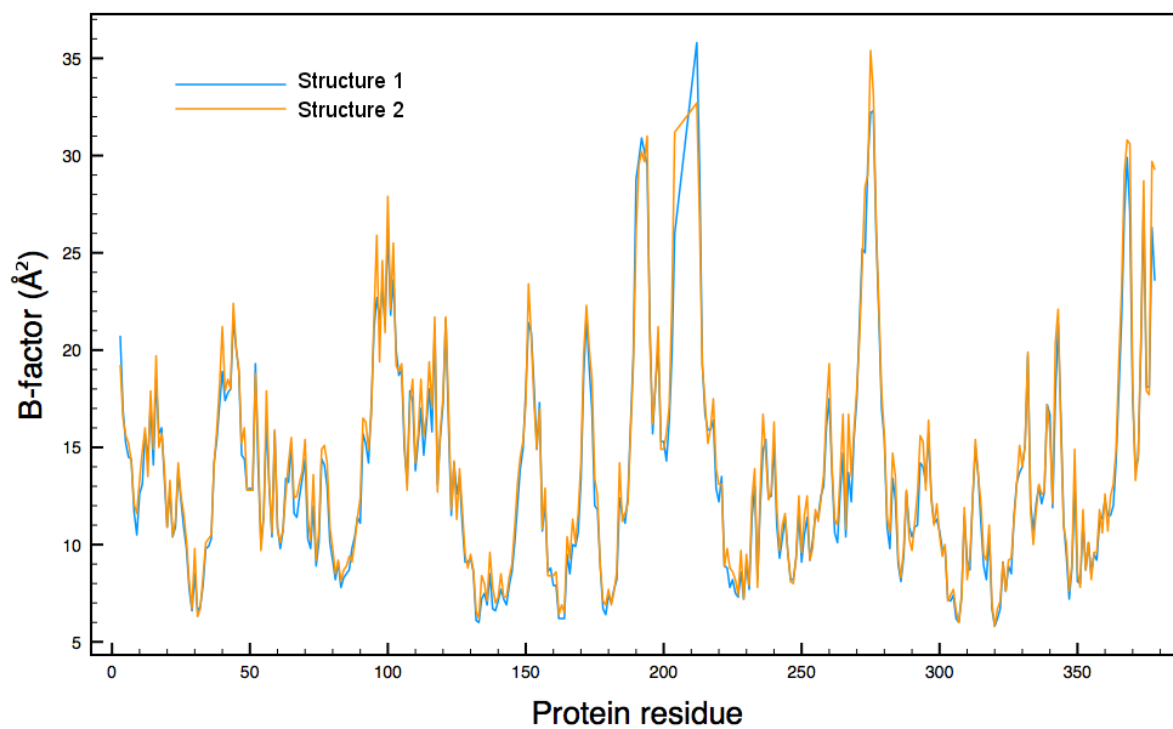

**Figure S4** Average all-atom B-factors per residue for the first (0.99 MGy, blue) and second (1.98 MGy, orange) structures of DtpA.

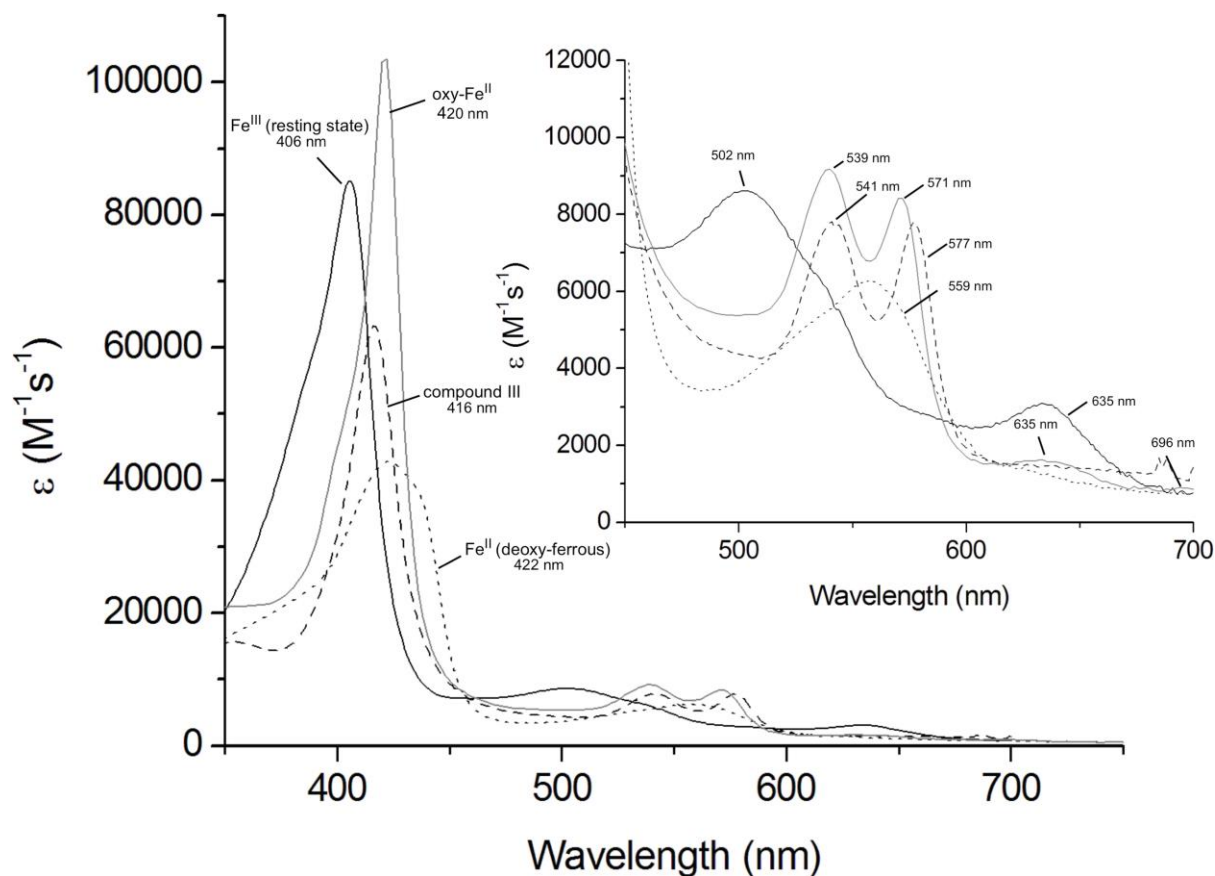

**Figure S5** UV-visible absorbance spectra at 20 °C of various haem oxidation states of DtpA (8  $\mu\text{M}$  in 20 mM NaPi, pH 7, 100 mM NaCl). Resting state ferric (solid black line), compound III (dashed line) generated following addition of 50-fold excess  $\text{H}_2\text{O}_2$  to the resting state enzyme, deoxy-ferrous (dotted line) following addition of excess  $\text{Na}_2\text{S}_2\text{O}_4$  to the resting state enzyme and oxy-ferrous (light grey line) in the presence of glycolaldehyde (a reducing agent). Inset, shows a close up of the Q bands with the relevant wavelengths depicted.
